# Supplementary material for: Intein-mediated backbone cyclization of entolimod confers enhanced radioprotective activity in mouse models
Source: PeerJ. 2018 Jun 18;6:e5043. doi: 10.7717/peerj.5043 (PMC6011820; doi:10.7717/peerj.5043)
Supplement: Supplemental Information 3 [file peerj-06-5043-s003.xlsx]

## Sheet: Sheet1
	9Gy		day 1	day 2	day 3	day 4	day 5	day 6	day 7	day 8	day 9	day 10	day 11	day 12	day 13	day 14	day 15	day 16	day 17	day 18	day 19	day 20	day 21	day 22	day 23	day 24	day 25	day 26	day 27	day 28	day 29	day 30
		PBS	12	12	12	12	12	12	12	10	1	0	0	0	0	0	0	0	0	0	0	0	0	0	0	0	0	0	0	0	0	0
		L-entolimod	12	12	12	12	12	12	12	12	12	11	9	9	9	9	9	9	8	8	8	8	8	8	8	8	8	8	8	8	8	8
		C-entolimod	12	12	12	12	12	12	12	12	12	12	12	12	12	12	11	11	11	11	11	11	11	11	11	11	11	11	11	11	11	11
	14Gy
		PBS	12	12	12	9	6	2	0	0	0	0	0	0	0	0	0	0	0	0	0	0	0	0	0	0	0	0	0	0	0	0
		L-entolimod	12	12	12	12	10	9	4	2	0	0	0	0	0	0	0	0	0	0	0	0	0	0	0	0	0	0	0	0	0	0
		C-entolimod	12	12	12	12	11	9	7	7	4	4	4	3	2	2	2	2	2	2	2	2	2	2	2	2	2	2	2	2	2	2
